# Supplementary material for: ZNF165 Is Involved in the Regulation of Immune Microenvironment and Promoting the Proliferation and Migration of Hepatocellular Carcinoma by AhR/CYP1A1
Source: Hindawi journal article supplement (doi:10.1155/2022/4446805), 2022-06-01
Supplement: f1 [file 4446805.f1.pdf]

Supplementary Table 1. The sequences used in qRT-PCR.

| Gene   | Sequence                                              |
|--------|-------------------------------------------------------|
| ZNF165 | F: ACCAAGGCCCATTTTGATTCA<br>R: CTCTGAGACTCCCCTGATTCTT |
| AhR    | F: CAAATCCTTCCAAGCGGCATA<br>R: CGCTGAGCCTAAGAAGTAAAG  |
| CYP1A1 | F: CTATCTGGGCTGTGG GCAA<br>R: CTGGCTCAAGCACAACTTGG    |
| CYP1B1 | F: AACCGCAACTTCAGCAACTT<br>R: GAGGATAAAGGCGTCCATCA    |
| GAPDH  | F: TGCACCACCAACTGCTTAG<br>R: GATGCAGGGATGATGTTC       |
